# Supplementary material
Source: PubMed Central journal article supplement (PMC4293713)
Supplement: DS_10.1177_0022034514548705.pdf [file DS_10.1177_0022034514548705.pdf]

U. Onoriobe<sup>1†</sup>, R.G. Rozier<sup>2\*</sup>, J. Cantrell<sup>2</sup>,  
and R.S. King<sup>1‡</sup>

<sup>1</sup>Oral Health Section, Division of Public Health, North Carolina Department of Health and Human Services, Raleigh, NC, USA; and <sup>2</sup>Department of Health Policy and Management, Gillings School of Global Public Health, University of North Carolina at Chapel Hill, Chapel Hill, NC, USA; \*corresponding author, gary\_rozier@unc.edu; †currently a graduate student at the University of Illinois at Chicago; ‡now retired

*J Dent Res* DOI: 10.1177/0022034514548705

## APPENDIX

### METHODS

#### Questionnaire Development

Questionnaires to be self-completed by parents of students in all grades and by students in grades 4-12 were developed for the study. The student questionnaires were devoted almost entirely to assessing self-reported oral health-related quality of life (OHRQoL) based on instruments previously tested for reliability and validity. In addition to OHRQoL, the parent questionnaire solicited information in a number of other domains, including sociodemographic characteristics (child age, parent educational attainment, race and ethnicity, income level, family size), dental knowledge and beliefs, access to dental care, and preventive exposures (sealants, community water fluoridation, fluoride mouth rinse, professionally applied topical fluoride, and fluoride dentifrice).

Parent questionnaires were distributed in English or Spanish based on knowledge of the teacher or research field staff about the primary language of the parent. Questions on the parent questionnaire were pilot-tested with 1,482 English-speaking parents of 1st-, 6th-, and 10th-grade students attending high- and low-income public schools in 17 counties in North Carolina (Kim *et al.*, 2006). The questionnaire was later revised and translated into Spanish and then pilot-tested with 6 native-Spanish-speaking adults.

#### Clinical Assessment Protocols and Examiner Reliability

All students received a clinical examination for enamel fluorosis and dental caries experience by 1 of 9 dentists trained and standardized in survey techniques. Assessments were conducted in the schools with portable dental equipment.

Fluorosis was measured *via* Dean's (1942) classification system. Teeth were wiped with gauze to remove debris and then viewed under an artificial light source without drying. Teeth

# Effects of Enamel Fluorosis and Dental Caries on Quality of Life

were not considered in the assignment of fluorosis scores if they were partially erupted or if one-half or more were affected by a carious lesion or restoration or were covered by an orthodontic appliance.

The diagnostic criteria for cavitated caries lesions and other conditions (*e.g.*, missing teeth) are with 1 or 2 exceptions—those adopted by the Caries Measurement Committee, Conference on Clinical Testing of Cariostatic Agents, sponsored by the American Dental Association (Radike, 1968). The modifications are consistent with those made by the National Institute of Dental and Craniofacial Research for carrying out clinical investigations of caries preventive agents and epidemiologic surveys (U.S. Department of Health and Human Services, 1989). These criteria also are generally comparable with those used in previous surveys in North Carolina (Rozier and King, 2005). The diagnostic criteria for noncavitated lesions are taken primarily from those developed by Iowa investigators for their longitudinal studies of children and fluoride exposures (Warren *et al.*, 2002). However, they generally are consistent with those suggested by an expert panel assembled by the National Institute of Dental and Craniofacial Research (Drury *et al.*, 1999) and investigators in England (Pitts, 1997).

#### Examiner Reliability

The unweighted Kappa statistic for duplicate assessments on 62 subjects for fluorosis categories (normal; questionable, very mild; mild, moderate, or severe) obtained at training was 0.70 (95% confidence interval [CI] = 0.54, 0.86). The unweighted Kappa statistic for duplicate assessments of caries status (normal, cavitated decayed, filled, missing because of caries [for permanent teeth only]) of each surface on 59 subjects was 0.79 (95% CI = 0.75, 0.83). The intraclass correlation coefficient for the child-level sum of  $D_{2-3}MFS$  and  $d_{2-3}fs$  was 0.88 (95% CI = 0.81, 0.93).

#### Data Collection and Processing

Fifty-six state and local public health dental hygienists who had ongoing school-based preventive dentistry programs in the

**Appendix Table 1.** Characteristics of Clinical Conditions

| Condition                                          | Sample Size<br>( <i>n</i> = 4,584) | Population                      |                       |                                         |
|----------------------------------------------------|------------------------------------|---------------------------------|-----------------------|-----------------------------------------|
|                                                    |                                    | Size<br>( <i>n</i> = 1,124,020) | Mean or<br>Percentage | Standard Error of<br>Mean or Percentage |
| Fluorosis, %                                       |                                    |                                 |                       |                                         |
| Anterior teeth                                     |                                    |                                 |                       |                                         |
| Normal                                             | 3,316                              | 807,346                         | 71.8%                 | 0.917                                   |
| Questionable or very mild                          | 1,108                              | 274,884                         | 24.4%                 | 0.827                                   |
| Mild, moderate, or severe                          | 160                                | 41,790                          | 3.7%                  | 0.391                                   |
| Posterior teeth                                    |                                    |                                 |                       |                                         |
| Normal                                             | 3,156                              | 773,097                         | 69.4%                 | 0.977                                   |
| Questionable or very mild                          | 1,233                              | 301,938                         | 27.1%                 | 0.914                                   |
| Mild, moderate, or severe                          | 149                                | 37,622                          | 3.3%                  | 0.347                                   |
| Anterior and posterior teeth                       |                                    |                                 |                       |                                         |
| Normal                                             | 2,903                              | 708,909                         | 63.0%                 | 0.995                                   |
| Questionable or very mild                          | 1,475                              | 361,771                         | 32.1%                 | 0.944                                   |
| Mild, moderate, or severe                          | 206                                | 53,340                          | 4.7%                  | 0.443                                   |
| Caries experience                                  |                                    |                                 |                       |                                         |
| Primary teeth <sup>a</sup>                         |                                    |                                 |                       |                                         |
| Percentage $d_{2,3}$ surfaces > 0                  | 421                                | 90,778                          | 30.2%                 | 1.362                                   |
| Mean $d_{2,3}$ surfaces                            | 1,371                              | 300,592                         | 1.40                  | 0.107                                   |
| Percentage $d_{2,3}f$ surfaces > 0                 | 791                                | 170,851                         | 56.8%                 | 1.522                                   |
| Mean $d_{2,3}f$ surfaces                           | 1,371                              | 300,592                         | 4.80                  | 0.230                                   |
| Permanent teeth                                    |                                    |                                 |                       |                                         |
| Percentage $D_{2,3}$ surfaces > 0                  | 669                                | 171,563                         | 15.2%                 | 0.797                                   |
| Mean $D_{2,3}$ surfaces                            | 4,584                              | 1,124,020                       | 0.38                  | 0.026                                   |
| Percentage $D_{2,3}MF$ surfaces > 0                | 1,813                              | 462,904                         | 41.1%                 | 1.039                                   |
| Mean $D_{2,3}MF$ surfaces                          | 4,584                              | 1,124,020                       | 1.89                  | 0.078                                   |
| Primary and permanent teeth                        |                                    |                                 |                       |                                         |
| Percentage $d_{2,3}f$ and $D_{2,3}MF$ surfaces > 0 | 2,612                              | 639,244                         | 56.8%                 | 0.987                                   |
| Mean sum $d_{2,3}f$ and $D_{2,3}MF$ surfaces       | 4,584                              | 1,124,020                       | 3.66                  | 0.108                                   |

SAS SurveyFreq for percentages; SurveyMeans for continuous values.

<sup>a</sup>For purposes of display in this table, sample is limited to five- to nine-year-old subjects.

selected study counties recruited and enrolled schools, teachers, and study subjects and administered the student questionnaires in the classroom. A survey packet containing a consent form, a parent questionnaire, and a return envelope was distributed to every student in the selected classrooms. Students were instructed to give their parents the packets and return consent forms and completed parent questionnaires within a stipulated period. Incentives of \$2, \$3, and \$5 were provided for students in grades K-3, 4-8, and 9-12, respectively.

Results of the clinical assessments were entered directly into a laptop computer at the time of the examination per an Access database program and transmitted electronically to the research central office with Blackboard software technology.

### Calculation of Values for Minimal Important Difference

We defined minimal important difference (MID) for this study after Schünemann *et al.* (2005) as the smallest difference in OHRQoL scores that children or their parents would perceive as important, either beneficial or harmful, and that would lead

them to consider a change in the management of fluorosis or caries.

MID estimates for OHRQoL scales have not been established, and only a small number of studies have reported MID values (Masood *et al.*, 2012). These studies mostly evaluated treatment interventions in adults. Likewise, no gold standard exists for determining MIDs in cross-sectional studies. We followed recent recommendations and estimated MID values using multiple approaches (Revicki *et al.*, 2008; Tsakos *et al.*, 2011; Masood *et al.*, 2012). We relied most heavily on an anchor-based approach using parents' global ratings of their children's oral health and students' ratings of their own oral health as external anchors in our primary method for determining criteria for MIDs in OHRQoL scores. We chose as the MID the smallest difference between all possible pairwise comparisons in response categories in the global Likert rating scales that had a Hedges' *g* of at least 0.2 and that also exceeded the standard error of measurement (SEM). We required that the MID value exceed measurement error, believing that the criterion was necessary to identify real differences. We calculated the SEM for each

**Appendix Table 2.** Characteristics of Scales for Oral Health–related Quality of Life

| Instrument and Subscales (No. Items) | Any Impacts             |                     | Severe Impacts          |                     | Severity <sup>a</sup> |
|--------------------------------------|-------------------------|---------------------|-------------------------|---------------------|-----------------------|
|                                      | Prevalence <sup>b</sup> | Extent <sup>c</sup> | Prevalence <sup>b</sup> | Extent <sup>c</sup> |                       |
| <b>CPQ<sub>8-10</sub></b>            |                         |                     |                         |                     |                       |
| Overall scale (25)                   | 97.0                    | 7.75 (0.242)        | 45.9                    | 3.24 (0.202)        | 13.09 (0.591)         |
| Oral symptoms (5)                    | 95.8                    | 3.02 (0.043)        | 36.5                    | 1.50 (0.054)        | 5.04 (0.136)          |
| Functional limitations (5)           | 48.8                    | 2.30 (0.077)        | 13.7                    | 1.66 (0.073)        | 1.94 (0.158)          |
| Emotional well-being (5)             | 65.8                    | 2.71 (0.069)        | 18.8                    | 2.15 (0.099)        | 3.25 (0.172)          |
| Social well-being (10)               | 55.1                    | 3.12 (0.125)        | 14.3                    | 2.17 (0.132)        | 2.86 (0.222)          |
| <b>CPQ<sub>11-14</sub></b>           |                         |                     |                         |                     |                       |
| Overall scale (37)                   | 99.7                    | 12.70 (0.230)       | 63.7                    | 3.15 (0.101)        | 21.34 (0.470)         |
| Oral symptoms (6)                    | 98.1                    | 3.69 (0.036)        | 27.5                    | 1.42 (0.038)        | 5.82 (0.080)          |
| Functional limitations (9)           | 88.8                    | 3.28 (0.050)        | 47.2                    | 1.49 (0.029)        | 5.57 (0.115)          |
| Emotional well-being (9)             | 76.9                    | 4.47 (0.075)        | 20.8                    | 2.48 (0.087)        | 5.62 (0.180)          |
| Social well-being (13)               | 72.4                    | 3.76 (0.095)        | 19.6                    | 2.01 (0.085)        | 4.38 (0.170)          |
| <b>ECOHIS</b>                        |                         |                     |                         |                     |                       |
| Overall scale (13)                   | 69.6                    | 4.13 (0.128)        | 16.7                    | 2.10 (0.146)        | 4.88 (0.207)          |
| Child symptoms (1)                   | 50.9                    | 1.00 (0.000)        | 3.6                     | 1.00 (0.000)        | 0.79 (0.033)          |
| Child function (4)                   | 38.7                    | 2.09 (0.046)        | 5.9                     | 1.37 (0.101)        | 1.28 (0.072)          |
| Child psychological (2)              | 24.8                    | 1.44 (0.030)        | 0.9                     | 1.14 (0.130)        | 0.51 (0.034)          |
| Child self-image (2)                 | 12.8                    | 1.62 (0.043)        | 1.5                     | 1.39 (0.115)        | 0.32 (0.032)          |
| Child overall (9)                    | 60.8                    | 3.10 (0.102)        | 8.9                     | 1.67 (0.165)        | 2.91 (0.144)          |
| Parent distress (2)                  | 27.0                    | 1.66 (0.030)        | 7.2                     | 1.45 (0.063)        | 0.92 (0.056)          |
| Family function (2)                  | 38.5                    | 1.41 (0.026)        | 7.9                     | 1.21 (0.044)        | 1.04 (0.052)          |
| Family overall (4)                   | 44.8                    | 2.22 (0.052)        | 11.7                    | 1.71 (0.089)        | 1.97 (0.096)          |
| <b>FIS</b>                           |                         |                     |                         |                     |                       |
| Overall Scale (14)                   | 41.8                    | 3.36 (0.101)        | 12.1                    | 2.21 (0.122)        | 2.50 (0.122)          |
| Parental/family activity (5)         | 30.5                    | 1.83 (0.044)        | 5.2                     | 1.35 (0.057)        | 0.90 (0.044)          |
| Parental emotions (4)                | 25.0                    | 1.93 (0.043)        | 8.5                     | 1.61 (0.058)        | 0.98 (0.052)          |
| Family conflict (4)                  | 14.3                    | 1.93 (0.056)        | 2.6                     | 1.68 (0.146)        | 0.47 (0.035)          |
| Financial burden (1)                 | 9.8                     | 1.00 (0.000)        | 1.8                     | 1.00 (0.000)        | 0.17 (0.013)          |

SAS SurveyFreq for percentages; SurveyMeans for continuous values.  
 CPQ<sub>8-10</sub>, Child Perceptions Questionnaire, grades 4-5; CPQ<sub>11-14</sub>, Child Perceptions Questionnaire, grades 6-12; ECOHIS, Early Childhood Oral Health Impact Scale; FIS, Family Impact Scale.  
<sup>a</sup>Mean sum of scores (SE).  
<sup>b</sup>Prevalence: > 0 impacts (in percentages).  
<sup>c</sup>Extent: mean no. (SE) among those with > 0.

OHRQoL scale using Cronbach’s alpha coefficient derived from our data set as the estimate of reliability in the SEM formula. We believe that our MID estimates are conservative because the SEM value is larger than the value determined by the anchor method for 3 of the 4 OHRQoL scales.

These MID values, determined by external anchors, were supplemented with effect sizes determined by internal data distribution methods (Hedges’ *g* for pairwise group comparisons and  $\eta^2$  for analysis of variance). We assumed an MID value to be any difference that met Cohen’s threshold for a small effect (Hedges’ *g* = .2,  $\eta^2$  = 0.01; Ellis, 2010: Table 2.1, p 40).

**RESULTS**

Appendix Table 1 provides detailed estimates of the clinical conditions. Appendix Table 2 provides detailed information about each of the 4 OHRQoL scales; it provides estimates of prevalence, extent, and severity for overall and subdomain

scores according to recommended guidelines (Tsakos *et al.*, 2011). Appendix Tables 3 and 4 supplement Tables 1 and 2, respectively, presented in the paper by providing an analysis of the bivariate associations of mean scores for each OHRQoL subdomain by clinical condition categories. Appendix Tables 5-8 provide results of the analysis to determine the MID for each OHRQoL scale. Differences are displayed for all possible pairwise comparisons of the mean OHRQoL score by response categories in the parent and child global rating scales. Each table also provides estimates for Hedges’ *g* for each comparison. The results in these tables were used to determine the MID value for each OHRQoL by applying the following criteria: the smallest difference in OHRQoL means by global rating response category, a Hedges’ *g* of at least 0.2; and a value that exceeded the SEM. The MID values selected for our study based on application of the specified criteria are displayed in Appendix Table 9 along with a summary of some characteristics of each OHRQoL scale.

**Appendix Table 3.** Mean Overall and Subdomain Quality-of-Life Scores by Enamel Fluorosis Category

| Variable                   | Overall <sup>a</sup> | Enamel Fluorosis in Anterior Teeth <sup>b</sup> |                            |                           | p Value |
|----------------------------|----------------------|-------------------------------------------------|----------------------------|---------------------------|---------|
|                            |                      | Unaffected                                      | Questionable,<br>Very Mild | Mild, Moderate,<br>Severe |         |
| <b>CPQ<sub>8-10</sub></b>  |                      |                                                 |                            |                           |         |
| Sample size <sup>c</sup>   | 965                  | 692 (71.3%)                                     | 246 (25.7%)                | 27 (2.8%)                 | —       |
| Overall scale              | 13.09 (0.591)        | 13.21 (0.689)                                   | 12.93 (0.871)              | 11.59 (1.319)             | .566    |
| Oral symptoms              | 5.04 (0.136)         | 5.07 (0.152)                                    | 4.97 (0.213)               | 5.01 (0.648)              | .920    |
| Functional limitations     | 1.94 (0.158)         | 2.04 (0.168)                                    | 1.74 (0.241)               | 1.15 (0.297)              | .024    |
| Emotional well-being       | 3.25 (0.172)         | 3.16 (0.208)                                    | 3.49 (0.258)               | 3.48 (0.639)              | .477    |
| Social well-being          | 2.86 (0.222)         | 2.96 (0.257)                                    | 2.72 (0.340)               | 1.79 (0.433)              | .054    |
| <b>CPQ<sub>11-14</sub></b> |                      |                                                 |                            |                           |         |
| Sample size <sup>c</sup>   | 2,409                | 1,721 (71.2%)                                   | 592 (24.5%)                | 96 (4.2%)                 | —       |
| Overall scale              | 21.34 (0.470)        | 21.23 (0.523)                                   | 21.54 (0.890)              | 22.14 (1.922)             | .867    |
| Oral symptoms              | 5.82 (0.080)         | 5.86 (0.095)                                    | 5.73 (0.145)               | 5.79 (0.400)              | .761    |
| Functional limitations     | 5.57 (0.116)         | 5.67 (0.144)                                    | 5.38 (0.187)               | 4.95 (0.494)              | .216    |
| Emotional well-being       | 5.62 (0.181)         | 5.50 (0.198)                                    | 5.74 (0.355)               | 6.78 (0.750)              | .227    |
| Social well-being          | 4.38 (0.170)         | 4.27 (0.179)                                    | 4.64 (0.359)               | 4.82 (0.750)              | .541    |
| <b>ECOHIS</b>              |                      |                                                 |                            |                           |         |
| Sample size <sup>c</sup>   | 1,130                | 836 (73.2%)                                     | 261 (23.9%)                | 33 (2.9%)                 | —       |
| Overall scale              | 4.88 (0.207)         | 4.72 (0.247)                                    | 5.23 (0.422)               | 5.79 (1.199)              | .502    |
| Child symptoms             | 0.79 (0.034)         | 0.75 (0.037)                                    | 0.89 (0.069)               | 0.98 (0.187)              | .109    |
| Child function             | 1.28 (0.072)         | 1.22 (0.089)                                    | 1.44 (0.135)               | 1.60 (0.369)              | .293    |
| Child psychological        | 0.51 (0.034)         | 0.50 (0.044)                                    | 0.57 (0.065)               | 0.37 (0.122)              | .340    |
| Child self-image/social    | 0.32 (0.033)         | 0.29 (0.039)                                    | 0.41 (0.075)               | 0.32 (0.144)              | .394    |
| Child overall              | 2.91 (0.145)         | 2.76 (0.172)                                    | 3.31 (0.286)               | 3.27 (0.656)              | .220    |
| Parent distress            | 0.92 (0.056)         | 0.95 (0.067)                                    | 0.82 (0.112)               | 1.24 (0.400)              | .348    |
| Family function            | 1.04 (0.052)         | 1.01 (0.060)                                    | 1.10 (0.112)               | 1.27 (0.321)              | .640    |
| Family overall             | 1.97 (0.096)         | 1.96 (0.112)                                    | 1.92 (0.196)               | 2.52 (0.629)              | .590    |
| <b>FIS</b>                 |                      |                                                 |                            |                           |         |
| Sample size <sup>c</sup>   | 3,105                | 2,223 (71.1%)                                   | 765 (24.8%)                | 117 (4.1%)                | —       |
| Overall scale              | 2.50 (0.122)         | 2.43 (0.132)                                    | 2.58 (0.216)               | 3.25 (0.779)              | .554    |
| Parental/family activity   | 0.90 (0.045)         | 0.90 (0.051)                                    | 0.89 (0.078)               | 1.07 (0.239)              | .754    |
| Parental emotions          | 0.98 (0.053)         | 0.93 (0.059)                                    | 1.06 (0.098)               | 1.23 (0.292)              | .394    |
| Family conflict            | 0.47 (0.035)         | 0.46 (0.038)                                    | 0.47 (0.070)               | 0.75 (0.255)              | .527    |
| Financial burden           | 0.17 (0.013)         | 0.16 (0.014)                                    | 0.20 (0.027)               | 0.19 (0.067)              | .415    |

CPQ<sub>8-10</sub>, Child Perceptions Questionnaire, grades 4-5; CPQ<sub>11-14</sub>, Child Perceptions Questionnaire, grades 6-12; ECOHIS, Early Childhood Oral Health Impact Scale; FIS, Family Impact Scale.

Unweighted sample sizes. All other estimates are calculated considering the complex sample design. Numbers in parentheses for quality-of-life estimates are standard errors of the mean. Missing values are not imputed.

<sup>a</sup>*n* = 4,584.

<sup>b</sup>Unaffected: *n* = 3,316; questionable, very mild: *n* = 1,108; mild, moderate, severe: *n* = 160.

<sup>c</sup>Row percentage distribution in parentheses.

**Appendix Table 4.** Mean Overall and Subdomain Quality-of-Life Scores by Caries Experience Category

| Variable                   | Overall <sup>a</sup> | Caries Experience in Primary and Permanent Teeth <sup>b</sup> |               |               | p Value |
|----------------------------|----------------------|---------------------------------------------------------------|---------------|---------------|---------|
|                            |                      | None                                                          | Low           | Moderate-High |         |
| <b>CPQ<sub>8-10</sub></b>  |                      |                                                               |               |               |         |
| Sample size <sup>c</sup>   | 965                  | 394 (41.7%)                                                   | 262 (27.2%)   | 309 (31.1%)   | —       |
| Overall scale              | 13.09 (0.591)        | 12.92 (0.812)                                                 | 13.35 (1.067) | 13.10 (0.799) | .928    |
| Oral symptoms              | 5.04 (0.136)         | 4.82 (0.190)                                                  | 5.10 (0.245)  | 5.30 (0.229)  | .257    |
| Functional limitations     | 1.94 (0.158)         | 1.91 (0.196)                                                  | 2.08 (0.262)  | 1.85 (0.190)  | .712    |
| Emotional well-being       | 3.25 (0.172)         | 3.22 (0.266)                                                  | 3.26 (0.342)  | 3.28 (0.227)  | .987    |
| Social well-being          | 2.86 (0.222)         | 2.92 (0.298)                                                  | 2.90 (0.382)  | 2.75 (0.311)  | .899    |
| <b>CPQ<sub>11-14</sub></b> |                      |                                                               |               |               |         |
| Sample size <sup>c</sup>   | 2,401                | 1,115 (45.4%)                                                 | 753 (31.4%)   | 533 (23.2%)   | —       |
| Overall scale              | 21.34 (0.470)        | 20.37 (0.647)                                                 | 21.74 (0.674) | 22.69 (0.858) | .043    |
| Oral symptoms              | 5.82 (0.080)         | 5.70 (0.124)                                                  | 5.77 (0.128)  | 6.13 (0.167)  | .116    |
| Functional limitations     | 5.57 (0.116)         | 5.28 (0.165)                                                  | 5.59 (0.182)  | 6.11 (0.266)  | .021    |
| Emotional well-being       | 5.62 (0.181)         | 5.35 (0.259)                                                  | 5.85 (0.280)  | 5.82 (0.289)  | .270    |
| Social well-being          | 4.38 (0.170)         | 4.08 (0.212)                                                  | 4.60 (0.251)  | 4.68 (0.299)  | .106    |
| <b>ECOHIS</b>              |                      |                                                               |               |               |         |
| Sample size <sup>c</sup>   | 1,130                | 427 (38.7%)                                                   | 245 (22.7%)   | 458 (38.6%)   | —       |
| Overall scale              | 4.88 (0.207)         | 2.41 (0.209)                                                  | 4.10 (0.345)  | 7.80 (0.380)  | <.001   |
| Child symptoms             | 0.79 (0.034)         | 0.42 (0.033)                                                  | 0.71 (0.053)  | 1.21 (0.057)  | <.001   |
| Child function             | 1.28 (0.072)         | 0.63 (0.073)                                                  | 1.07 (0.118)  | 2.06 (0.13)   | <.001   |
| Child psychological        | 0.51 (0.034)         | 0.31 (0.043)                                                  | 0.40 (0.059)  | 0.78 (0.065)  | <.001   |
| Child self-image/social    | 0.32 (0.033)         | 0.18 (0.038)                                                  | 0.22 (0.047)  | 0.52 (0.63)   | <.001   |
| Child overall scale        | 2.91 (0.145)         | 1.54 (0.141)                                                  | 2.40 (0.204)  | 4.58 (0.262)  | <.001   |
| Parent distress            | 0.92 (0.056)         | 0.38 (0.058)                                                  | 0.70 (0.105)  | 1.60 (0.105)  | <.001   |
| Family function            | 1.04 (0.052)         | 0.49 (0.056)                                                  | 1.00 (0.110)  | 1.62 (0.093)  | <.001   |
| Family overall scale       | 1.97 (0.096)         | 0.87 (0.096)                                                  | 1.70 (0.194)  | 3.22 (0.171)  | <.001   |
| <b>FIS</b>                 |                      |                                                               |               |               |         |
| Sample size <sup>c</sup>   | 3,105                | 1,389 (44.3%)                                                 | 933 (30.3%)   | 783 (25.4%)   | —       |
| Overall scale              | 2.50 (0.122)         | 1.87 (0.145)                                                  | 2.73 (0.204)  | 3.32 (0.279)  | <.001   |
| Parental/family activity   | 0.90 (0.045)         | 0.69 (0.057)                                                  | 0.94 (0.079)  | 1.23 (0.099)  | <.001   |
| Parental emotions          | 0.98 (0.053)         | 0.71 (0.064)                                                  | 1.05 (0.084)  | 1.36 (0.128)  | <.001   |
| Family conflict            | 0.47 (0.035)         | 0.36 (0.039)                                                  | 0.56 (0.064)  | 0.56 (0.072)  | .010    |
| Financial burden           | 0.17 (0.013)         | 0.14 (0.016)                                                  | 0.20 (0.028)  | 0.20 (0.025)  | .044    |

CPQ<sub>8-10</sub>, Child Perceptions Questionnaire, grades 4-5; CPQ<sub>11-14</sub>, Child Perceptions Questionnaire, grades 6-12; ECOHIS, Early Childhood Oral Health Impact Scale; FIS, Family Impact Scale.

Unweighted sample sizes. All other estimates are calculated considering the complex sample design. Numbers in parentheses for quality-of-life estimates are standard errors of the mean. Missing values are not imputed.

<sup>a</sup>n = 4,584.

<sup>b</sup>None: n = 1,972 (43.1%); low: n = 1,284 (28.6%); moderate-high: n = 1,328 (28.2%).

<sup>c</sup>Row percentage distribution in parentheses.

**Appendix Table 5.** Absolute Difference in Pairwise Comparisons of Mean CPQ<sub>8-10</sub> Scores by Student Global Rating of Oral Health

| Level Comparison   | Level 1, Level 2 |                              | Difference in Means | Hedges' <i>g</i> (95% CI) |
|--------------------|------------------|------------------------------|---------------------|---------------------------|
|                    | Sample Size      | Mean ± SD                    |                     |                           |
| Very good vs. good | 161, 421         | 9.70 ± 12.40, 10.29 ± 10.27  | 0.59                | 0.05 (0.14-0.03)          |
| Very good vs. OK   | 161, 341         | 9.70 ± 12.40, 16.29 ± 13.59  | 6.59                | 0.50 (0.54-0.46)          |
| Very good vs. poor | 161, 41          | 9.70 ± 12.40, 29.27 ± 21.36  | 19.57               | 1.34 (1.01-1.67)          |
| Good vs. OK        | 421, 341         | 10.29 ± 10.27, 16.29 ± 13.59 | 6.00                | 0.51 (0.47-0.54)          |
| Good vs. poor      | 421, 41          | 10.29 ± 10.27, 29.27 ± 21.36 | 18.98               | 1.63 (1.13-2.12)          |
| OK vs. poor        | 341, 41          | 16.29 ± 13.59, 29.27 ± 21.36 | 12.98               | 0.89 (0.53-1.25)          |

Student global rating of oral health: "When you think about your teeth or mouth, would you say that they are: very good, good, OK, poor?"

Average difference between means for adjacent Likert scale response levels = 6.52.

Overall mean for 4-level response scale = 13.11 ± 13.26; analysis of variance, *p* value ≤ .001;  $\eta^2 = 0.114$ .

CI, confidence interval; CPQ<sub>8-10</sub>, Child Perceptions Questionnaire, grades 4-5.

**Appendix Table 6.** Absolute Difference in Pairwise Comparisons of Mean CPQ<sub>11-14</sub> Scores by Student Global Rating of Oral Health

| Level Comparison        | Level 1, Level 2 |                              | Difference in Means | Hedges' <i>g</i> (95% CI) |
|-------------------------|------------------|------------------------------|---------------------|---------------------------|
|                         | Sample Size      | Mean ± SD                    |                     |                           |
| Excellent vs. very good | 308, 850         | 15.48 ± 12.66, 18.66 ± 14.47 | 3.18                | 0.23 (0.26-0.20)          |
| Excellent vs. good      | 308, 910         | 15.48 ± 12.66, 22.75 ± 15.50 | 7.27                | 0.49 (0.52-0.46)          |
| Excellent vs. fair      | 308, 287         | 15.48 ± 12.66, 29.26 ± 18.90 | 13.78               | 0.86 (0.81-0.91)          |
| Excellent vs. poor      | 308, 29          | 15.48 ± 12.66, 41.66 ± 19.81 | 26.17               | 1.95 (1.50-2.41)          |
| Very good vs. good      | 850, 910         | 18.66 ± 14.47, 22.75 ± 15.50 | 4.09                | 0.27 (0.27-0.28)          |
| Very good vs. fair      | 850, 287         | 18.66 ± 14.47, 29.26 ± 18.90 | 10.60               | 0.68 (0.60-0.75)          |
| Very good vs. poor      | 850, 29          | 18.66 ± 14.47, 41.66 ± 19.81 | 22.99               | 1.57 (1.12-2.02)          |
| Good vs. fair           | 910, 287         | 22.75 ± 15.50, 29.26 ± 18.90 | 6.51                | 0.40 (0.32-0.47)          |
| Good vs. poor           | 910, 29          | 22.75 ± 15.50, 41.66 ± 19.81 | 18.90               | 1.21 (0.79-1.62)          |
| Fair vs. poor           | 287, 29          | 29.26 ± 18.90, 41.66 ± 19.81 | 12.39               | 0.65 (0.37-0.93)          |

Student global rating of oral health: "Would you say the health of your teeth, lips, jaws, and mouth is: excellent, very good, good, fair, poor?"

Average difference between means for adjacent Likert scale response levels = 6.54.

Overall mean for 5-level response scale = 21.40 ± 16.01; analysis of variance, *p* value ≤ .001;  $\eta^2 = 0.080$ .

CI, confidence interval; CPQ<sub>11-14</sub>, Child Perceptions Questionnaire, grades 6-12.

**Appendix Table 7.** Absolute Difference in Pairwise Comparisons of Mean ECOHIS Scores by Parent Global Rating of Oral Health

| Level Comparison        | Level 1, Level 2 |                           | Difference in Means | Hedges' <i>g</i> (95% CI) |
|-------------------------|------------------|---------------------------|---------------------|---------------------------|
|                         | Sample Size      | Mean ± SD                 |                     |                           |
| Excellent vs. very good | 208, 362         | 1.62 ± 2.96, 3.54 ± 5.37  | 1.92                | 0.42 (0.38-0.45)          |
| Excellent vs. good      | 208, 353         | 1.62 ± 2.96, 6.13 ± 6.42  | 4.51                | 0.83 (0.79-0.88)          |
| Excellent vs. fair      | 208, 162         | 1.62 ± 2.96, 8.14 ± 7.50  | 6.52                | 1.20 (1.06-1.34)          |
| Excellent vs. poor      | 208, 37          | 1.62 ± 2.96, 11.00 ± 9.00 | 9.38                | 2.13 (1.54-2.72)          |
| Very good vs. good      | 362, 353         | 3.54 ± 5.37, 6.13 ± 6.42  | 2.59                | 0.44 (0.42-0.46)          |
| Very good vs. fair      | 362, 162         | 3.54 ± 5.37, 8.14 ± 7.50  | 4.59                | 0.75 (0.65-0.85)          |
| Very good vs. poor      | 362, 37          | 3.54 ± 5.37, 11.00 ± 9.00 | 7.46                | 1.29 (0.86-1.71)          |
| Good vs. fair           | 353, 162         | 6.13 ± 6.42, 8.14 ± 7.50  | 2.01                | 0.30 (0.22-0.37)          |
| Good vs. poor           | 353, 37          | 6.13 ± 6.42, 11.00 ± 9.00 | 4.87                | 0.73 (0.38-1.07)          |
| Fair vs. poor           | 162, 37          | 8.14 ± 7.50, 11.00 ± 9.00 | 2.86                | 0.37 (0.13-0.60)          |

Parent global rating of oral health: "How would you rate your child's dental health: excellent, very good, good, fair, poor?"

Average difference between means for adjacent Likert scale response levels = 2.34.

Overall mean for 5-level response scale = 4.94 ± 6.36; analysis of variance, *p* value ≤ .001;  $\eta^2 = 0.144$ .

CI, confidence interval; ECOHIS, Early Childhood Oral Health Impact Scale.

**Appendix Table 8.** Absolute Difference in Pairwise Comparisons of Mean FIS Scores by Parent Global Rating of Oral Health

| Level Comparison        | Level 1, Level 2 |                            | Difference in Means | Hedges' <i>g</i> (95% CI) |
|-------------------------|------------------|----------------------------|---------------------|---------------------------|
|                         | Sample Size      | Mean ± SD                  |                     |                           |
| Excellent vs. very good | 678, 1,066       | 0.73 ± 2.10, 1.63 ± 3.84   | 0.90                | 0.27 (0.25-0.30)          |
| Excellent vs. good      | 678, 930         | 0.73 ± 2.10, 2.71 ± 4.97   | 1.97                | 0.49 (0.45-0.53)          |
| Excellent vs. fair      | 678, 363         | 0.73 ± 2.10, 5.78 ± 7.10   | 5.05                | 1.12 (0.99-1.24)          |
| Excellent vs. poor      | 678, 58          | 0.73 ± 2.10, 12.00 ± 11.14 | 11.27               | 3.04 (2.29-3.79)          |
| Very good vs. good      | 1,066, 930       | 1.63 ± 3.84, 2.71 ± 4.97   | 1.07                | 0.24 (0.22-0.26)          |
| Very good vs. fair      | 1,066, 363       | 1.63 ± 3.84, 5.78 ± 7.10   | 4.15                | 0.85 (0.75-0.95)          |
| Very good vs. poor      | 1,066, 58        | 1.63 ± 3.84, 12.00 ± 11.14 | 10.37               | 2.30 (1.70-2.90)          |
| Good vs. fair           | 930, 363         | 2.71 ± 4.97, 5.78 ± 7.10   | 3.08                | 0.55 (0.47-0.62)          |
| Good vs. poor           | 930, 58          | 2.71 ± 4.97, 12.00 ± 11.14 | 9.29                | 1.69 (1.21-2.16)          |
| Fair vs. poor           | 363, 58          | 5.78 ± 7.10, 12.00 ± 11.14 | 6.22                | 0.80 (0.52-1.08)          |

Parent global rating of oral health: "How would you rate your child's dental health: excellent, very good, good, fair, poor?"  
 Average difference between means for adjacent Likert scale response levels = 2.82.  
 Overall mean for 5-level response scale = 2.45 ± 6.06; analysis of variance, *p* value ≤ .001;  $\eta^2 = 0.153$ .  
 CI, confidence interval; FIS, Family Impact Scale.

**Appendix Table 9.** Characteristics for OHRQoL Scales and Analysis to Determine Potential MIDs for Each Scale

| Scale                | Scores |             |             |                         | Anchor Analysis of Global Ratings      |                                 |                                 |
|----------------------|--------|-------------|-------------|-------------------------|----------------------------------------|---------------------------------|---------------------------------|
|                      | Values | Mean ± SD   | One-Half SD | SEM ± SD                | Levels <sup>a</sup>                    | Average Difference <sup>b</sup> | Minimum Difference <sup>c</sup> |
| CPQ <sub>8-10</sub>  | 0-100  | 13.1 ± 13.2 | 6.6         | 4.4 ± 13.2              | Very good, good, OK, poor              | 6.5                             | 6.0 <sup>d</sup>                |
| CPQ <sub>11-14</sub> | 0-148  | 21.4 ± 16.0 | 8.0         | 4.6 ± 16.0 <sup>d</sup> | Excellent, very good, good, fair, poor | 6.5                             | 3.1                             |
| ECOHIS               | 0-52   | 4.9 ± 6.3   | 3.1         | 2.7 ± 6.3 <sup>d</sup>  | Excellent, very good, good, fair, poor | 2.3                             | 1.9                             |
| FIS                  | 0-56   | 2.4 ± 6.0   | 3.0         | 1.2 ± 5.0 <sup>d</sup>  | Excellent, very good, good, fair, poor | 2.8                             | 0.9                             |

MID, minimal important difference; OHRQoL, oral health-related quality of life.  
<sup>a</sup>Global oral health scale levels.  
<sup>b</sup>Average difference between levels (SD).  
<sup>c</sup>Minimum difference between levels with Hedges' *g* > 0.2.  
<sup>d</sup>Meets MID selection criteria for OHRQoL scale.

**APPENDIX REFERENCES**

- Dean HT (1942). The Investigation of physiological effects by the epidemiological method. In: *Fluorine and Dental Health*. Moulton FR, ed. Washington, DC: American Association for the Advancement of Science, Publication No. 19, pp. 23-31.
- Drury TF, Horowitz AM, Ismail AI, Maertens MP, Rozier RG, Selwitz RH (1999). Diagnosing and reporting early childhood caries for research purposes: a report of a workshop sponsored by the National Institute of Dental and Craniofacial Research, the Health Resources and Services Administration, and the Health Care Financing Administration. *J Public Health Dent* 59:192-197.
- Ellis PD (2010). *The Essential Guide to Effect Sizes: Statistical Power, Meta-analysis and the Interpretation of Research Results*. New York, NY: Cambridge University Press.
- Kim HY, Preisser JS, Rozier RG, Valiyaparambil JV (2006). Multilevel analysis of group-randomized trials with binary outcomes. *Community Dent Oral Epidemiol* 34:241-251.
- Masood M, Masood Y, Saub R, Newton JT (2012). Need of minimal important difference for oral health-related quality of life measures. *J Public Health Dent* 74:13-20.
- Pitts NB (1997). Diagnostic tools and measurements: impact on appropriate care. *Community Dent Oral Epidemiol* 25:24-35.
- Radike AW (1968). Criteria for diagnosis of dental caries. In: *Proceedings of the Conference on the Clinical Testing of Cariostatic Agents*. Chicago, IL: American Dental Association, pp 87-88.
- Revicki D, Hays RD, Cella D, Sloan J (2008). Recommended methods for determining responsiveness and minimally important differences for patient-reported outcomes. *J Clin Epidemiol* 61:102-109.
- Rozier RG, King RS (2005). Defining the need for dental care in North Carolina: contributions of public health surveillance of dental diseases and conditions. *N C Med J* 66:438-144.
- Schünemann HJ, Puhan M, Goldstein R, Jaeschke R, Guyatt GH (2005). Measurement properties and interpretability of the Chronic Respiratory Disease Questionnaire (CRQ). *COPD* 2:81-89.
- Tsakos G, Allen PF, Steele JG, Locker D (2011). Interpreting oral health-related quality of life data. *Community Dent Oral Epidemiol* 40:193-200.
- U.S. Department of Health and Human Services (1989). *Oral Health of United States Children: The National Survey of Dental Caries in U.S. School Children: 1986-87*. Bethesda, MD: National Institutes of Health. NIH Publication No. 89-2247.
- Warren JJ, Levy SM, Kanellis MJ (2002). Dental caries in the primary dentition: assessing prevalence of cavitated and non-cavitated lesions. *J Public Health Dent* 62:109-114.
